# Supplementary material for: Reactive myelopoiesis and FX-expressing macrophages triggered by chemotherapy promote cancer lung metastasis
Source: JCI journal article supplement (doi:10.1172/jci.insight.167499), 2023-03-28
Supplement: sd1 [file 1]

## **Supplemental Data**

### **Reactive myelopoiesis and FX-expressing macrophages triggered by chemotherapy promote cancer lung metastasis**

Caijun Wu, Qian Zhong, Rejeena Shrestha, Jingzhi Wang, Xiaoling Hu, Hong Li, Eric C. Rouchka, Jun Yan, Chuanlin Ding

**Supplemental Table 1.** Antibodies used in Flow cytometry and Western blotting

| <b>Antibodies</b>                                    | <b>Company and catalog number</b>       |
|------------------------------------------------------|-----------------------------------------|
| PerCP/Cyanine5.5 anti-mouse CD45                     | BioLegend No. 157208                    |
| PE/Cyanine7 anti-mouse CD45                          | BioLegend No. 103114                    |
| APC anti-mouse/human CD11b                           | BioLegend No. 101212                    |
| PE anti-mouse Ly6G                                   | BioLegend No. 127608                    |
| PerCP anti-mouse Ly6C                                | BioLegend No. 128028                    |
| PE anti-mouse F4/80                                  | BioLegend No. 123110                    |
| FITC anti-mouse CD11c                                | BioLegend No. 117306                    |
| APC anti-mouse CD3                                   | BioLegend No. 100236                    |
| APC anti-mouse CD4                                   | BioLegend No. 100412                    |
| FITC anti-mouse CD8a                                 | BioLegend No. 100706                    |
| APC anti-mouse NK-1.1                                | BioLegend No. 108710                    |
| APC anti-mouse CD19                                  | BioLegend No. 115512                    |
| APC anti-mouse Ly-6G/Ly-6C                           | BioLegend No. 108412                    |
| APC anti-mouse TER-119                               | BioLegend No. 116212                    |
| Anti-mouse Ly6A/E (Sca-1)                            | BD Bioscience No. 553108                |
| PE/Cyanine7 anti-mouse CD117 (c-kit)                 | BioLegend No. 135112                    |
| FITC anti-mouse CD48                                 | BioLegend No. 103404                    |
| PE/Cyanine5 anti-mouse CD150 (SLAM)                  | BioLegend No. 115912                    |
| PE anti-mouse IFN- $\gamma$                          | BioLegend No. 505808                    |
| PE anti-human/mouse Granzyme B                       | BioLegend No. 372208                    |
| PE anti-mouse FoxP3                                  | BioLegend No. 126404                    |
| APC-conjugated anti-mouse CCR2                       | R&D Systems No. FAB5538A-100            |
| Fixable Viability Dye eFluor™ 780                    | Thermo Fisher Scientific No. 65-0865-14 |
| Polyclonal Rabbit anti-Human F10 / Factor X Antibody | LifeSpan BioSciences No. LS-C331476     |

**Supplemental Table 2.** Antibodies used in CyTOF

|    | <b>Antibodies</b>                           | <b>Company and catalog number</b> |
|----|---------------------------------------------|-----------------------------------|
| 1  | Anti-Mouse CD45 (30-F11)-89Y                | Fluidigm, No. 3089005B            |
| 2  | Anti-Mouse Ly-6G (1A8)-141Pr                | Fluidigm, No. 3141008B            |
| 3  | Anti-Mouse CD11c (N418)-142Nd               | Fluidigm, No. 3142003B            |
| 4  | Anti-Mouse CD69 (H1.2F3)-143Nd              | Fluidigm, No. 3143004B            |
| 5  | Anti-Mouse CD4 (RM4-5)-145Nd                | Fluidigm, No. 3145002B            |
| 6  | Anti-Mouse F4/80 (BM8)-146Nd                | Fluidigm, No. 3146008B            |
| 7  | Anti-Mouse CD103 (2E7)/148Nd                | Biolegend, No. 121402             |
| 8  | Anti-Mouse CD19 (6D5)-149Sm                 | Fluidigm, No. 3149002B            |
| 9  | Anti-Mouse Ly-6C (HK1.4)-150Nd              | Fluidigm, No. 3150010B            |
| 10 | Anti-Mouse CD25 (3C7)-151Eu                 | Fluidigm, No. 3151007B            |
| 11 | Anti-Mouse CD3e (145-2C11)-152Sm            | Fluidigm, No. 3152004B            |
| 12 | Anti-Mouse CD274/PD-L1-153Eu (10F.9G2)      | Fluidigm, No. 3153016B            |
| 13 | Anti-Mouse PD-1 (29F.1A12)-159Tb            | Fluidigm, No. 3159024B            |
| 14 | Anti-Mouse CD62L (MEL-14)-160Gd             | Fluidigm, No. 3160008B            |
| 15 | Anti-Human/Mouse CD44 (IM7)-162Dy           | Fluidigm, No. 3162030B            |
| 16 | Anti-Mouse CX3CR1 (SA011F11)-164Dy          | Fluidigm, No. 3164023B            |
| 17 | Anti-Mouse CD8a (53-6.7)-168Er              | Fluidigm, No. 3168003B            |
| 18 | Anti-Mouse CD206/MMR (C068C2)-169Tm         | Fluidigm, No. 3169021B            |
| 19 | Anti-Mouse NK1.1 (PK136)-170Er              | Fluidigm, No. 3170002B            |
| 20 | Anti-Mouse CD11b (M1/70 )-172Yb             | Fluidigm, No. 3172012B            |
| 21 | Anti-Mouse CD223/LAG3 (C9B7W)-174Yb         | Fluidigm, No. 3174019B            |
| 22 | Anti-Human/Mouse CD45R/B220 (RA3-6B2)-176Yb | Fluidigm, No. 3176002B            |
| 23 | Anti-Mouse I-A/I-E (M5/114.15.2)-209Bi      | Fluidigm, No. 3209006B            |
| 24 | Anti-Mouse CD127/IL7Ra (A7R34)-175Lu        | Fluidigm, No. 3175006B            |

## Supplemental Figure 1

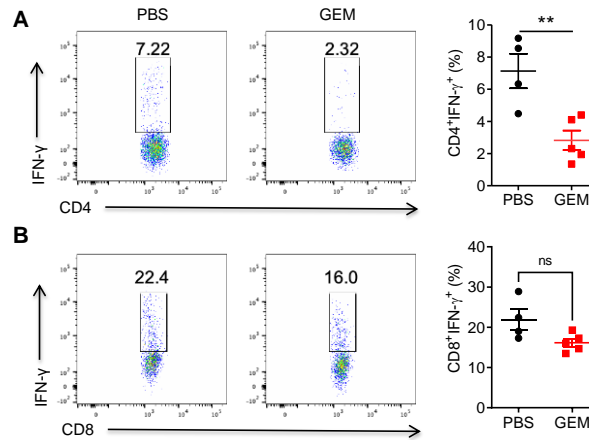

**Figure S1.** Mice bearing subcutaneous E0771 tumor cells were treated with 4 times of GEM in two weeks. Lung tissues were collected 2 days later after last GEM treatment. Cells were stimulated with PMA/Ionomycin in the presence of protein transport inhibitor brefeldin A for 4 hours. IFN- $\gamma$  producing CD4<sup>+</sup> T cells (**A**) and CD8<sup>+</sup> T cells (**B**) were determined by intracellular cytokine staining and Flow cytometry. Each dot represents one mouse (n=4-5). \*\* $p < 0.01$  by unpaired 2-sided  $t$  test.

## Supplemental Figure 2

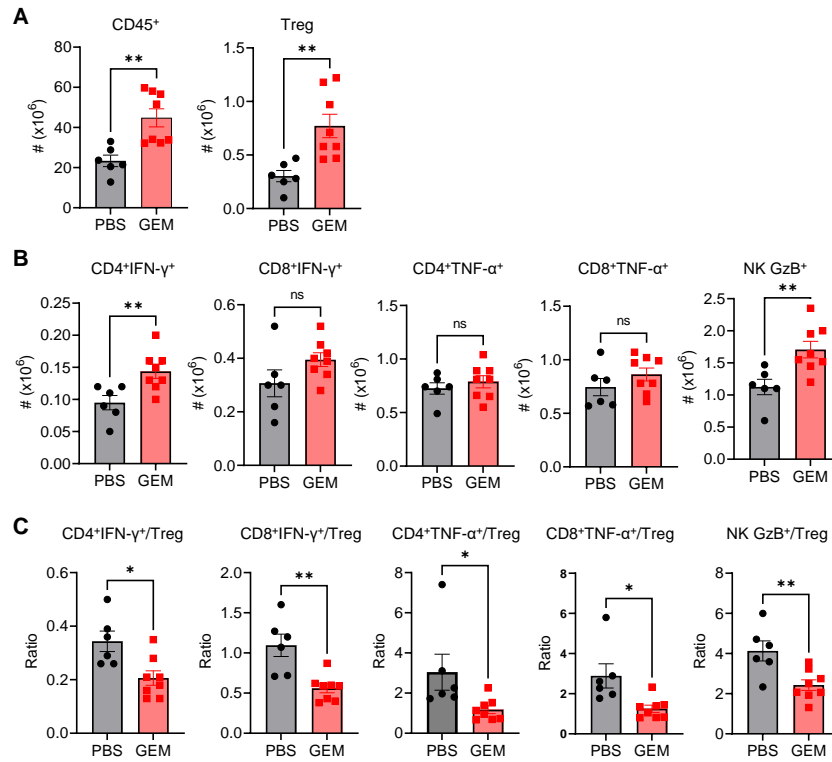

**Figure S2.** Tumor free mice were treated with 4 times of GEM or PBS followed by intravenous injection of  $4 \times 10^5$  E0771-GFP cells. Lung tissues were collected at day 14 after tumor cell injection. **(A)** Total numbers of CD45<sup>+</sup> and Treg cells in each lung. **(B)** Total numbers of effective T cells and NK cells. **(C)** Ratios of effective T cells and NK cells to Treg cells. Each dot represents one mouse (n=6-8). \* $p < 0.05$ , \*\* $p < 0.01$  by unpaired 2-sided  $t$  test.

### Supplemental Figure 3

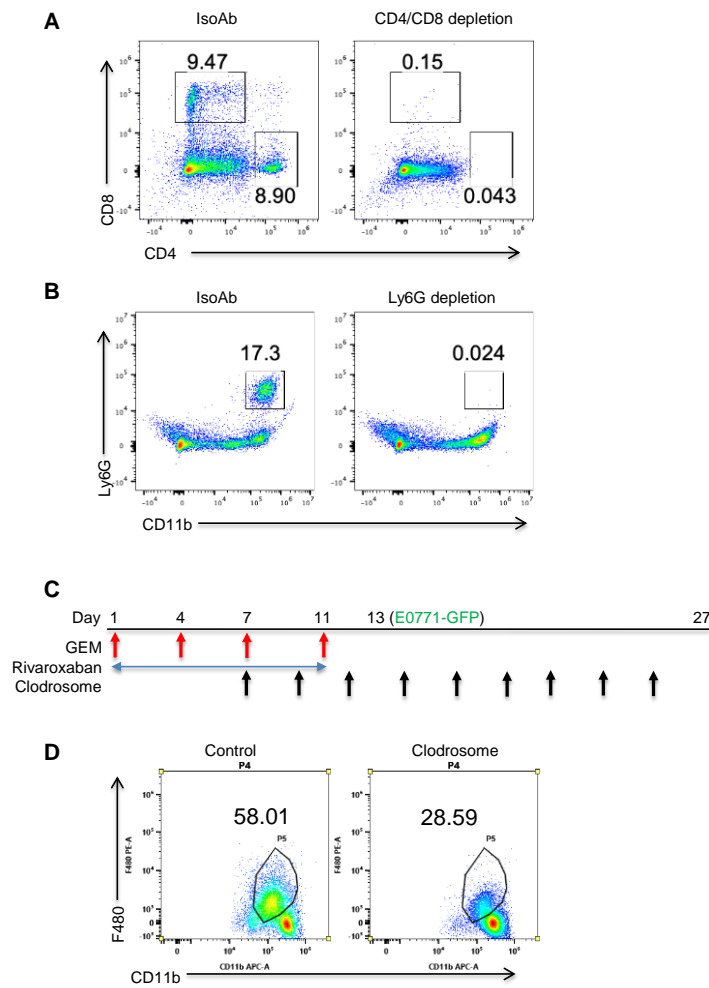

**Figure S3.** (A) Depletion efficiency of CD4<sup>+</sup> and CD8<sup>+</sup> T cells in the lungs. (B) Depletion efficiency of Ly6G<sup>+</sup> cells in the lungs. (C) Schema for in vivo GEM and Rivaroxaban treatment, macrophage depletion, and E0771-GFP tumor cell intravenous injection. (D) Lung macrophage depletion efficacy after intravenous injection of 3 times of Clodrosome was determined by staining cells with CD45, CD11b, F4/80, and viability dye. Cells were gated on CD45<sup>+</sup>CD11b<sup>+</sup> population.

## Supplemental Figure 4

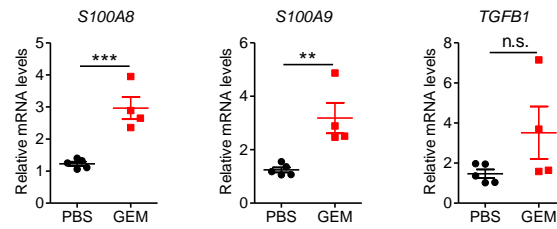

**Figure S4.** Naïve mice were treated with 4 times of GEM in two weeks. Lung tissues were collected 48 hours later after last treatment. Gene expression of *S100A8*, *S100A9*, and *TGFB1* in lung tissues from GEM and PBS treated mice was determined with qRT-PCR. Each dot represents one mouse (n=4-5). \*\* $p < 0.01$ , \*\*\* $p < 0.001$  by unpaired 2-sided  $t$  test.

## Supplemental Figure 5

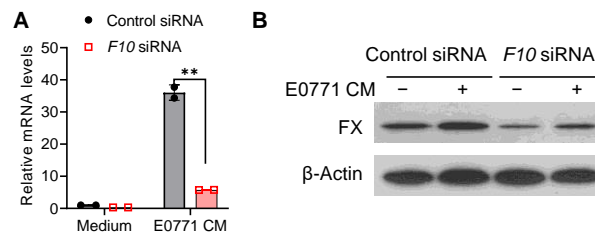

**Figure S5.** BM-derived macrophages were transfected with control siRNA and *F10* siRNA. 24 hours later cells were treated with 20% E0771 conditioned medium (CM) for 24 hours. *F10* gene knock down efficiency was determined by using qRT-PCR (**A**) and Western blotting (**B**). \*\*p < 0.01 by unpaired 2-sided t test.



## Supplemental Figure 6

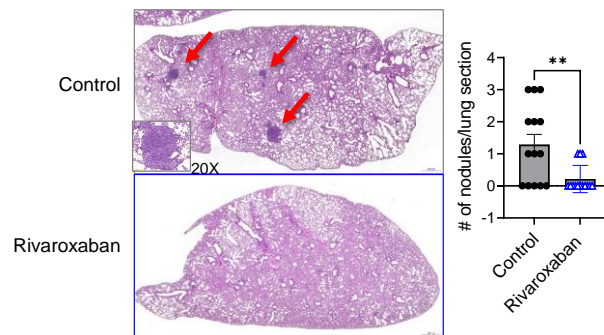

**Figure S6.** E0771-GFP subcutaneous tumor-bearing mice (primary tumor size between 6-8 mm in diameter) were treated with Rivaroxaban (oral, 20 mg/kg, daily) or solvent control for two weeks. Lung tissues were collected at day 31 after tumor cell injection. The metastasis in lungs was determined by evaluation of tumor nodules using H&E staining. One section represents one mouse (n=14). Numbers of nodule per lung section were counted and summarized. \*\* $p < 0.01$  by unpaired 2-sided  $t$  test.

## Supplemental Figure 7

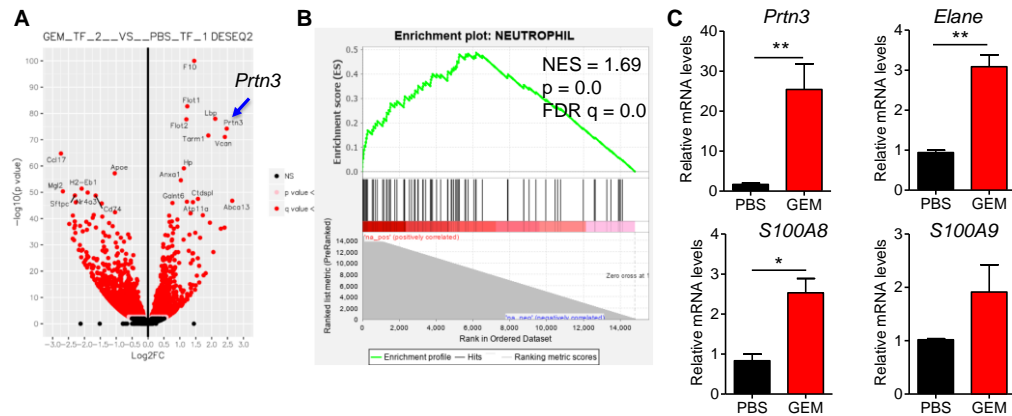

**Figure S7. (A)** Differential gene expression in sorted macrophages from GEM-treated tumor-free mice as compared to macrophages from PBS-treated mice. Gene *Prtn3* is one of DEGs in lung macrophages. **(B)** Analysis of lung macrophage RNA-seq data revealed the enrichment plot with upregulation of neutrophil signature genes in lung macrophages from GEM-treated versus PBS-treated tumor-free mice. **(C)** Lung monocytes (CD45<sup>+</sup>CD11b<sup>+</sup>Ly6C<sup>high</sup>) were sorted for gene expression analysis using qRT-PCR. \* $p < 0.05$ , \*\* $p < 0.01$  by unpaired 2-sided  $t$  test.

## Supplemental Figure 8

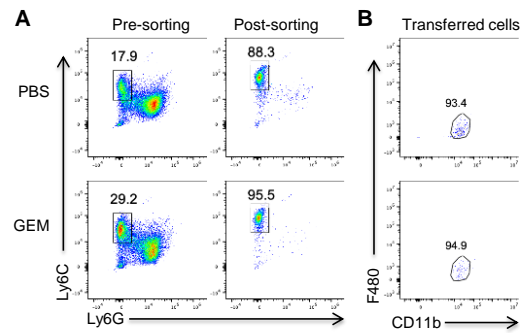

**Figure S8.** (A) Percentages of BM monocytes from PBS and GEM treated mice before and after purification. (B) CFSE labeled purified monocytes ( $1.5 \times 10^6$ ) were intravenously injected into CCR2 KO mice. Expression of CD11b and F480 in transferred cells (CFSE<sup>+</sup>) in the lungs analyzed 48 hours later.

## Supplemental Figure 9

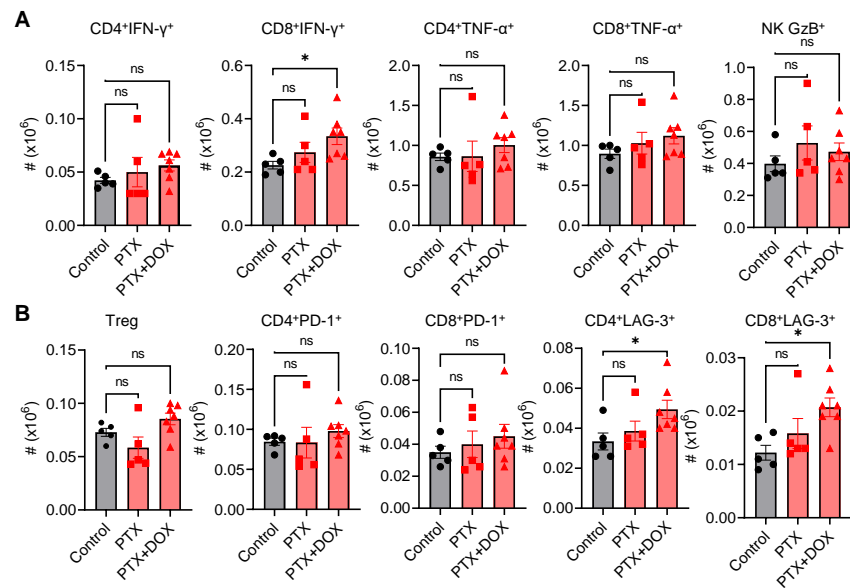

**Figure S9.** Tumor free mice were treated with PTX or PTX plus DOX. Lung tissues were collected 48 hours later. **(A)** Total numbers of effective CD4<sup>+</sup>, CD8<sup>+</sup> T cells and granzyme B (GzB)<sup>+</sup> NK cells. **(B)** Total cell number of immunosuppressive Treg and PD-1, LAG-3 expressing CD4<sup>+</sup>, CD8<sup>+</sup> T cells. \* $p < 0.05$  by ordinary one-way ANOVA.
